# Supplementary material
Source: Springer Nature journal article supplement (https://www.springermedizin.de/resource/supplementary/12885_2008_1374_MOESM3_ESM.pdf/9472790)

Transcriptional levels of PADI4 (copies/ug)

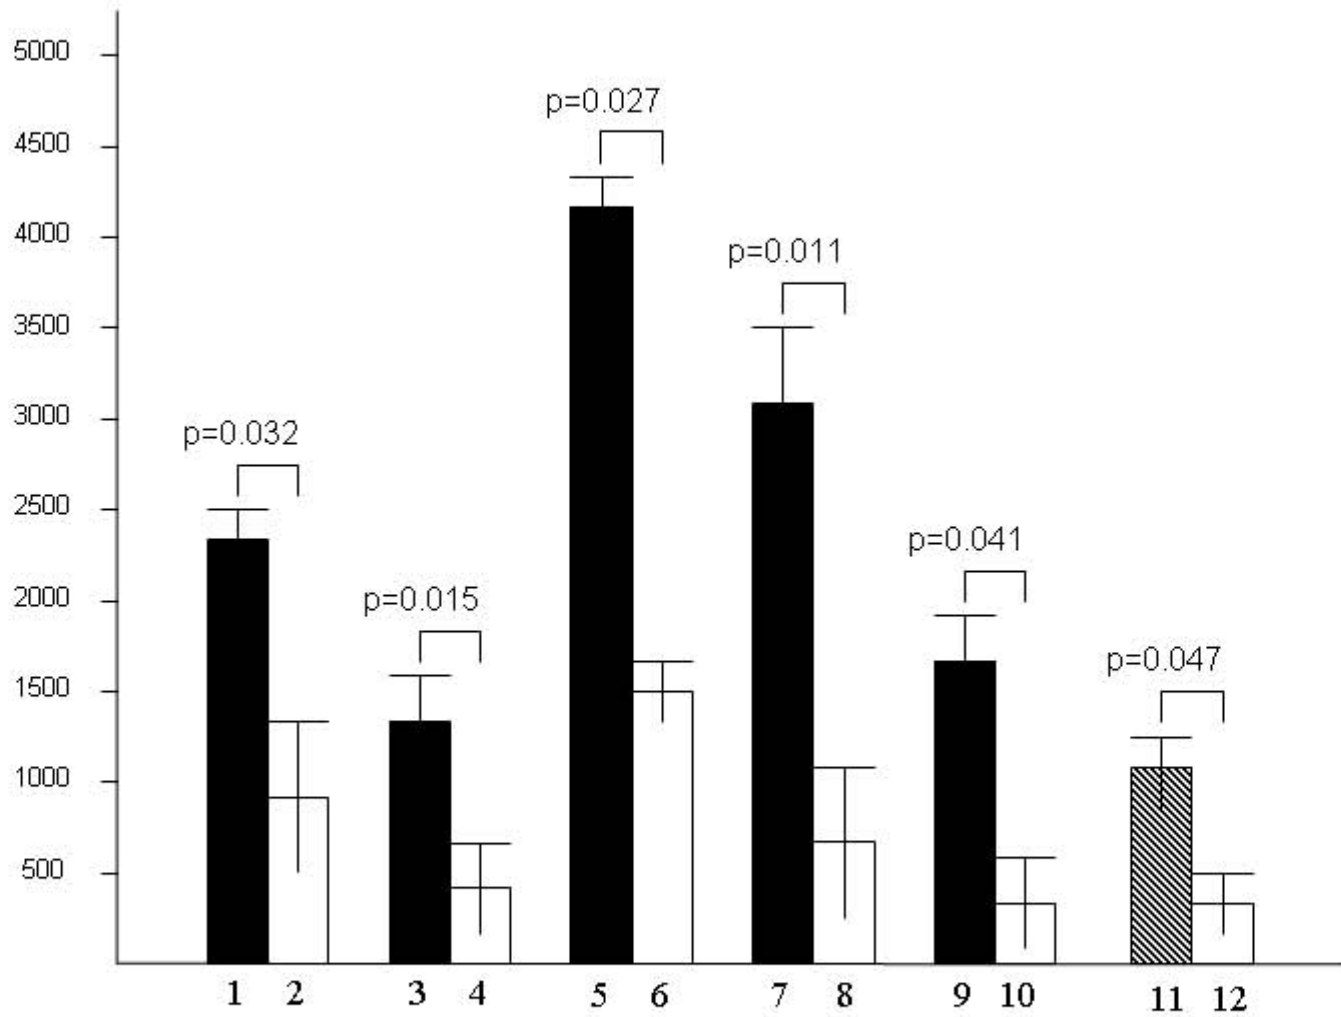

Supplement: MOESM3 [file 9472790]
